# Supplementary material for: Creatine kinase in the diagnosis and prognostic prediction of amyotrophic lateral sclerosis: a retrospective case-control study
Source: PubMed Central journal article supplement — Neural Regen Res. 2020 Sep 22;16(3):591–5. doi: 10.4103/1673-5374.293159 (PMC7996010; doi:10.4103/1673-5374.293159), 2020-09-22
Supplement: NRR-16-591_Suppl1.pdf [file NRR-16-591_Suppl1.pdf]

当前位置:量表登记 (/iibs/main/index.dhtml)>痴呆 (dementia) (/iibs/main/indexadmin.dhtml?type=patientInfo&id=fa7af7d6b5894b4fb6598473201785b7)>新增病例

## 基线信息

## 知情同意书

科研项目中需涉及病人或正常人血液标本采集受试者须知

### 知情同意书

方案名称：神经变性、神经遗传及运动障碍病的临床、遗传及生物学标记物研究

### 原始病历资料

方案编号：

### 一般资料

方案版本号：2015年11月2.0版本

### 蒙特利尔认知评估

知情同意书版本号：

### 简易智能精神状态检查量表 (MMSE)

研究机构：四川大学华西医院神经内科

主要研究者（负责研究医师）：

### 额叶功能评定量表 (FAB)

您将被邀请参加一项临床研究。本知情同意书提供给您一些信息以帮助

### 汉密尔顿抑郁量表

您决定是否参加此项临床研究。请您仔细阅读，如有任何疑问请向负责该项

### 汉密尔顿焦虑量表 (HAMA)

研究的研究者提出。

### IADL

您参加本项研究是自愿的。本次研究已通过本研究机构伦理审查委员会审查。

### HC大认知

**研究目的：**神经变性及运动障碍疾病是一类缓慢起病、病程进行性发展的疾病。目前主要有几大类型：以运动障碍为主的有帕金森病，多系统萎缩等；以认知障碍为主的有阿尔茨海默病，额颞叶痴呆、路易体痴呆等；以肌无力和肌萎缩为特征的有运动神经元病等；还有一些少见的与遗传代谢相关的神经变性病，其中以阿尔茨海默氏病（老年性痴呆）和帕金森氏病最为常见。此类疾病具有高发病率、高患病率和高致残率的特点，给家庭和社会带来了沉重的负担。临床上对神经变性病无法早期诊断，更无有效防治措施，成熟神经细胞变性后难以再生和修复，其最大特点是其进行性损害，如何减缓或逆转其过程是神经生物学和临床医学面临的重大难题。因此，为了提高神经变性及运动障碍疾病的早期鉴别诊断率，阐明这些疾病的致病发生及发展的可能机制，我们将从临床，遗传及生物标记物等方面对这些疾病进行研究。

在您同意参加本次调查之前，需要了解可能的风险和受益，以便在您充分知情的情况下作出决定，这就是“知情同意”。

请仔细阅读知情同意书，您可以和研究护士或其他人讨论（包括朋友或者亲属等）。在您了解了本次调查的性质、步骤及要求后，如同意参加，您需要在知情同意书上签字。您参加本调查完全是自愿的，这意味着您可以自由选择参加或者不参加调查。无论参加与否都不会影响医生对您的治疗。

**研究过程：**如果您同意参与这项研究，我们将对每位受试者进行编号，建立病历档案。在研究过程中我们需要采集一些您的标本，将由专业人员为您取样，例如从您的胳膊上抽取静脉血 10 毫升，共需 1 次。您的样品仅用于 本研究项目的遗传学及生物标记物 研究。）

**风险与不适：**对于您来说，所有的信息将是保密的。您的样本采集将严格按照无菌要求操作，标本的采集可能会有一些非常小的风险，包括短暂的疼痛、局部青紫，少数人会有轻度头晕，或极为罕见的针头感染。

**受益：**通过对您的标本进行检测将有助于对疾病作出诊断，为您的治疗提供必要的建议，或为疾病的研究提供有益的信息。

本调查结果将为国内外神经变性，神经遗传及运动障碍疾病治疗现状提供基本的数据，对指导总体临床诊断，提高治疗水平具有实际意义。您及其他神经变性，神经遗传及运动障碍疾病患者将因此共同获益。

另外，作为你如果是神经变性及运动障碍疾病患者，如帕金森病，由于该疾病是长期慢性病，药物干预做为主要的治疗方法，而肝肾功的定期复查十分重要，因此，作为经济补偿，我们会免费为你提供一次肝肾功的检查（价值100元人民币左右），如果你自己觉得没有必要做该项检查或近期（一般6-12月左右）已做该项检查，我们直接给你100元人民币作为经济补偿；如果你是健康正常人，我们为你提供100元人民币作为交通费、检验营养费用的补偿。

作为研究受试者，您有以下职责：提供有关自身病史和当前身体状况的真实情况；告诉研究医生自己在本次研究期间所出现的任何不适；告诉研究医生自己在最近是否曾参与其他研究，或目前正参与其他研究。

**隐私问题：**如果您决定参加本项研究，您参加试验及在试验中的个人资料均属保密。您的血/尿标本将以研究编号数字而非您的姓名加以标识。可以识别您身份的信息将不会透露给研究小组以外的成员，除非获得您的许可。所有的研究成员和研究申办方都被要求对您的身份保密。您的档案将保存在有锁的档案柜中，仅供研究人员查阅。为确保研究按照规定进行，必要时，政府管理部门或伦理审查委员会的成员按规定可以在研究单位查阅您的个人资料。这项研究结果发表时，将不会披露您个人的任何资料。

如果您因参与这项研究而受到伤害：如发生与该项临床研究相关的损害时，您可以获得免费治疗和 / 或相应的补偿。

您可以选择不参加本项研究，或者在任何时候通知研究者要求退出研究，您的数据将不纳入研究结果，您的任何医疗待遇与权益不会因此而受到影响。

如果您需要其它治疗，或者您没有遵守研究计划，或者发生了与研究相关的损伤或者有任何其它原因，研究医师可以终止您继续参与本项研究。

您可随时了解与本研究有关的信息资料和研究进展，如果您有与本研究有关的问题，或您在研究过程中发生了任何不适与损伤，或有关于本项研究参加者权益方面的问题您可以通过15828238252与 商慧芳教授团队联系。

## 知情同意书

科研项目中需涉及收集病人或正常人病史、临床、流行病学数据的调查

### 受试者须知

方案名称：神经变性、神经遗传及运动障碍病的临床、遗传及生物标记物研究

方案编号：

方案版本号：2015年11月2.0版本

知情同意书版本号：

研究机构：四川大学华西医院神经内科

主要研究者（负责研究医师）：

您将被邀请参加一项临床研究。本知情同意书提供给您一些信息以帮助您决定是否参加此项临床研究。请您仔细阅读，如有任何疑问请向负责该项研究的研究者提出。

您参加本项研究是自愿的。本次研究已通过本研究机构伦理审查委员会审查。

**研究目的：**神经变性及运动障碍疾病是一类缓慢起病、病程进行性发展的疾病。目前主要有几大类型：以运动障碍为主要表现的有帕金森病、多系统萎缩、进行性核上性眼肌麻痹、亨廷顿病等；以认知障碍为主的有阿尔茨海默病、额颞叶痴呆、路易体痴呆等；以肌无力和肌萎缩为特征的有运动神经元病等；还有一些神经系统遗传性疾病，如肝豆状核变性、脊髓小脑共济失调、腓骨肌萎缩症等。此类疾病具有高发病率、高患病率和高致残率的特点，给家庭和社会带来了沉重的负担。临床上对神经遗传变性病和运动障碍病早期诊断困难，更目前无根治措施，成熟神经细胞变性后难以再生和修复，其最大特点是其进行性损害，如何减缓或逆转其过程是神经生物学和临床医学面临的重大难题。因此，为了提高神经遗传变性病及运动障碍病的早期诊断，总结疾病的演变规律特征，寻找遗传和生物学标记物，从而阐明这些疾病的可能的发生及发展机制，为更好为患者治疗服务。因此，我们将从临床特征、遗传及生物标记物等方面对这些疾病进行研究。

在您同意参加本次调查之前，需要了解可能的风险和受益，以便在您充分知情的情况下作出决定，这就是“知情同意”。

请仔细阅读知情同意书，您可以和研究护士或其他人讨论（包括朋友或者亲属等）。在您了解了本次调查的性质、步骤及要求后，如同意参加，您需要在知情同意书上签字。您参加本调查完全是自愿的，这意味着您可以自由选择参加或者不参加调查。无论参加与否都不会影响医生对您的治疗。

**研究过程：**如果您同意参与这项研究，我们将和您或您的家人进行详细沟通，向您介绍该项研究的有关情况，也请您提供与疾病有关的情况，包括发病过程、家族史、以前就诊情况及曾经做过一些检查结果等。我们将对每位参与者进行编号，建立病历档案。

**风险与不适：**对于您来说，与我们进行沟通、交谈可能会有些心理不适。

**受益：**通过对您的信息资料进行研究，将为您的治疗提供必要的建议，或为疾病的研究提供有益的信息。

本调查结果将为国内外神经变性，神经遗传及运动障碍疾病治疗现状提供基本的数据，对指导总体临床诊断，提高治疗水平具有实际意义。您及其他神经变性，神经遗传及运动障碍疾病患者将因此共同获益。

**隐私问题：**如果您决定参加本项研究，您参加试验及在试验中的个人资料均属保密。负责研究医师及其他研究人员将使用您的医疗信息进行研究。这些信息可能包括您的姓名、地址、电话号码、病史及在您研究来访时得到的信息。您的档案将保存在有锁的档案柜中，仅供研究人员查阅。为确保研究按照规定进行，必要时，政府管理部门或伦理审查委员会的成员按规定可以在研究单位查阅您的个人资料。这项研究结果发表时，将不会披露您个人的任何资料。

如果您因参与这项研究而受到伤害：如发生与临床研究相关的损害时，您可以获得免费治疗和 / 或相应的补偿。

您可以选择不参加本项研究，或者在任何时候通知研究者要求退出研究，您的数据将不纳入研究结果，您的任何医疗待遇与权益不会因此而受到影响。

如果您需要其它治疗，或者您没有遵守研究计划，或者发生了与研究相关的损伤或者有任何其它原因，研究医师可以终止您继续参与本项研究。

您可随时了解与本研究有关的信息资料和研究进展，如果您有与本研究有关的问题，或您在研究过程中发生了任何不适与损伤，或有关于本项研究参加者权益方面的问题您可以通过15828238252与商慧芳教授团队联系。。

### 知情同意书

我已经阅读了本知情同意书。

我有机会提问而且所有问题均已得到解答。

我理解参加本项研究是自愿的。

我可以选择不参加本项研究，或者在任何时候通知研究者后退出而不会遭到歧视或报复，我的任何医疗待遇与权益不会因此而受到影响。

如果我需要其它治疗，或者我没有遵守研究计划，或者发生了与研究相关的损伤或者有任何其它原因，研究医师可以终止我继续参与本项研究。

受试者签名及日期:

点击签名

保存

Copyright 2016-2018 华西医院商慧芳教授临床疾病登记系统 All Rights Reserved. 版权所有
