# Supplementary material for: Creatine kinase in the diagnosis and prognostic prediction of amyotrophic lateral sclerosis: a retrospective case-control study
Source: PubMed Central journal article supplement — Neural Regen Res. 2020 Sep 22;16(3):591–5. doi: 10.4103/1673-5374.293159 (PMC7996010; doi:10.4103/1673-5374.293159), 2020-09-22
Supplement: NRR-16-591_Suppl2.pdf [file NRR-16-591_Suppl2.pdf]

# 四川大学华西医院临床试验与生物医学伦理专委会审查批件

2015年 审 ( 236 ) 号

|                                                                                                                                                                                                                                                                                                                                                                                                                                                                                                                                                                                                                                                                                                                                                                                                                                                                                                                                                                                                              |                                |                    |
|--------------------------------------------------------------------------------------------------------------------------------------------------------------------------------------------------------------------------------------------------------------------------------------------------------------------------------------------------------------------------------------------------------------------------------------------------------------------------------------------------------------------------------------------------------------------------------------------------------------------------------------------------------------------------------------------------------------------------------------------------------------------------------------------------------------------------------------------------------------------------------------------------------------------------------------------------------------------------------------------------------------|--------------------------------|--------------------|
| 科室 ( 专业 ) : 神经内科                                                                                                                                                                                                                                                                                                                                                                                                                                                                                                                                                                                                                                                                                                                                                                                                                                                                                                                                                                                             | 项目负责人姓名及职称 : 商慧芳 教授            |                    |
| 项目名称                                                                                                                                                                                                                                                                                                                                                                                                                                                                                                                                                                                                                                                                                                                                                                                                                                                                                                                                                                                                         | 神经变性、神经遗传及运动障碍病的临床、遗传及生物学标记物研究 |                    |
| 研究方案                                                                                                                                                                                                                                                                                                                                                                                                                                                                                                                                                                                                                                                                                                                                                                                                                                                                                                                                                                                                         | 版本号 : 2015年12月3.0版本            | 版本日期 : 2015年12月22日 |
| 知情同意书                                                                                                                                                                                                                                                                                                                                                                                                                                                                                                                                                                                                                                                                                                                                                                                                                                                                                                                                                                                                        | 版本号 : 无                        | 版本日期 : 无           |
| <p>审查意见 :</p> <ol style="list-style-type: none"> <li>1. 研究者资质符合伦理要求。</li> <li>2. 研究方案及知情同意书基本符合伦理要求。</li> </ol> <p>审查结果 : <input checked="" type="checkbox"/>同意   <input type="checkbox"/>作必要修正后同意   <input type="checkbox"/>作必要修正后再审   <input type="checkbox"/>不同意   <input type="checkbox"/>终止或暂停</p> <p>请遵循我国相关法律、法规和规章 ( SFDA 《药物临床试验质量管理规范》 ( 2003 ) 、《医疗器械临床试验规定》 ( 2004 ) 、WMA 《赫尔辛基宣言》和CIOMS 《人体生物医学研究国际道德指南》、卫生部 《涉及人的生物医学研究伦理审查办法 ( 试行 ) ( 2007 ) 》 ) , 遵循伦理委员会批准的方案和知情同意书开展临床试验 ( 研究 ) , 保护受试者的健康与权利。</p> <p>在试验 ( 研究 ) 过程中, 若变更主要研究者, 对临床研究方案、知情同意书等的任何修改, 请申请人提交修正案审查申请。</p> <p>发生严重不良事件, 请申请人及时提交严重不良事件报告; 紧急报告之后, 尽快提交详细的严重不良事件随访报告。</p> <p>请递交年度和定期跟踪审查报告; 当出现任何可能显著影响试验 ( 研究 ) 进行或增加受试者危险的情况时, 请申请人及时向伦理专委会提交书面报告。</p> <p>试验 ( 研究 ) 纳入了不符合纳入标准或符合排除标准的受试者, 符合中止试验 ( 研究 ) 规定而未让受试者退出试验 ( 研究 ) , 给予错误治疗或剂量, 给予方案禁止的合并用药等没有遵从方案开展研究的情况; 或可能对受试者的权益/健康、以及研究的科学性造成不良影响等违背伦理原则与规范的情况, 请申办者/监查员/研究者提交违背方案报告。</p> <p>申请人暂停或提前终止临床试验 ( 研究 ) , 请及时提交暂停/终止试验 ( 研究 ) 报告。完成临床试验 ( 研究 ) , 请申请人提交结题报告。</p> |                                |                    |
| <p>单位 ( 章 ) : </p> <p>主任委员 ( 签名 ) : </p> <p style="text-align: center;">2015年12月23日</p>                                                                                                                                                                                                                                                                                                                                                                                                                                                                                                                                                                                                                                                                                                                                             |                                |                    |
