# Supplementary material for: Creatine kinase in the diagnosis and prognostic prediction of amyotrophic lateral sclerosis: a retrospective case-control study
Source: PubMed Central journal article supplement — Neural Regen Res. 2020 Sep 22;16(3):591–5. doi: 10.4103/1673-5374.293159 (PMC7996010; doi:10.4103/1673-5374.293159), 2020-09-22
Supplement: NRR-16-591_Suppl3.pdf [file NRR-16-591_Suppl3.pdf]

## OPEN PEER REVIEW REPORT 1

**Name of journal:** Neural Regeneration Research

**Manuscript NO:** NRR-D-19-00759

**Title:** Creatine kinase in amyotrophic lateral sclerosis

**Reviewer's Name:** Sagar Gaikwad

**Reviewer's country:** USA

**Date sent for review:** 2020-1-22

### COMMENTS TO AUTHORS

This is an interesting paper, which shows creatine kinase (CK) can be used as an independent marker for survival prognosis in amyotrophic lateral sclerosis (ALS) patients with limb-onset, and it CK levels decreases with the progression of disease. Authors demonstrate that Serum CK levels were significantly increased in both ALS patients and healthy controls. Particularly, CK levels were shown to elevated in ALS patients with limb-onset. Further, authors demonstrate a higher log CK was correlated with better survival of ALS and CK levels were significantly lower in second time examination.

Overall, this is a well written manuscript with proper methods for a purpose; most results are convincing and support the author's conclusion.
