# Supplementary material for: Creatine kinase in the diagnosis and prognostic prediction of amyotrophic lateral sclerosis: a retrospective case-control study
Source: PubMed Central journal article supplement — Neural Regen Res. 2020 Sep 22;16(3):591–5. doi: 10.4103/1673-5374.293159 (PMC7996010; doi:10.4103/1673-5374.293159), 2020-09-22
Supplement: NRR-16-591_Suppl4.pdf [file NRR-16-591_Suppl4.pdf]

## OPEN PEER REVIEW REPORT 2

**Name of journal:** Neural Regeneration Research

**Manuscript NO:** NRR-D-19-00759

**Title:** Creatine kinase in amyotrophic lateral sclerosis

**Reviewer's Name:** Colin J. Barnstable

**Reviewer's country:** USA

**Date sent for review:** 2020-1-22

### COMMENTS TO AUTHORS

This is an excellent study that confirms previous identification of creatine kinase as a useful marker for ALS and is a continuation of work previously published from this group. The manuscript also provides an excellent review of previous studies that have also evaluated creatine kinase as a marker.

The authors mention that patients were characterized genetically, but do not indicate whether any of them had previously described genetic markers of ALS. Also, were any of the cases familial?

The authors should be clearer that the patients in this study included those in the Amyotrophic Lateral Sclerosis and Frontotemporal Degeneration paper published last year (ref 15 in the present manuscript). In this paper the actual levels of serum components were given and the author should make more direct reference to them.
